# Supplementary material for: Highly stable Pd2+ species anchoring on ethylenediamine-grafted-MIL-101(Cr) as a robust oxidation catalyst
Source: Royal Society of Chemistry journal article supplement (doi:10.1039/d1cy01932e), 2022-01-01
Supplement: d1cy01932e1.pdf [file d1cy01932e1.pdf]

## Supplementary Information

# Highly stable Pd<sup>2+</sup> species anchoring on ethylenediamine-grafted-MIL-101(Cr) as a robust oxidation catalyst

## Materials

Terephthalic acid (98%), Chromium(III) nitrate ( $\text{Cr}(\text{NO}_3)_3 \cdot 9\text{H}_2\text{O}$ , 99%), ethylenediamine (99%), palladium(II) acetate ( $\text{Pd}(\text{OAc})_2$ , 98%), phenylacetylene (98%), iodobenzene (98%) and nitrobenzene (99%) were obtained commercially from Sigma-Aldrich. *N,N*-dimethylformamide (DMF, 99.8%), methanol (99.8%), ethanol (99.5%), acetone (99.5%), acetonitrile (99.8%), potassium carbonate ( $\text{K}_2\text{CO}_3$ , 99%), sodium carbonate ( $\text{Na}_2\text{CO}_3$ , 99%), 30%  $\text{H}_2\text{O}_2$  solution and diethyl ether (99%) were provided by Carlo. Styrene (99%, Merck) was purified by extracting twice with 10% sodium hydroxide ( $\text{NaOH}$ , 98%) solution, washed three times with distilled water and dried over calcium hydride (Merck, 95%). Toluene (99.5%), dichloromethane (99.8%) and *n*-hexane (95%) were dried and stored under molecular sieve 4A.

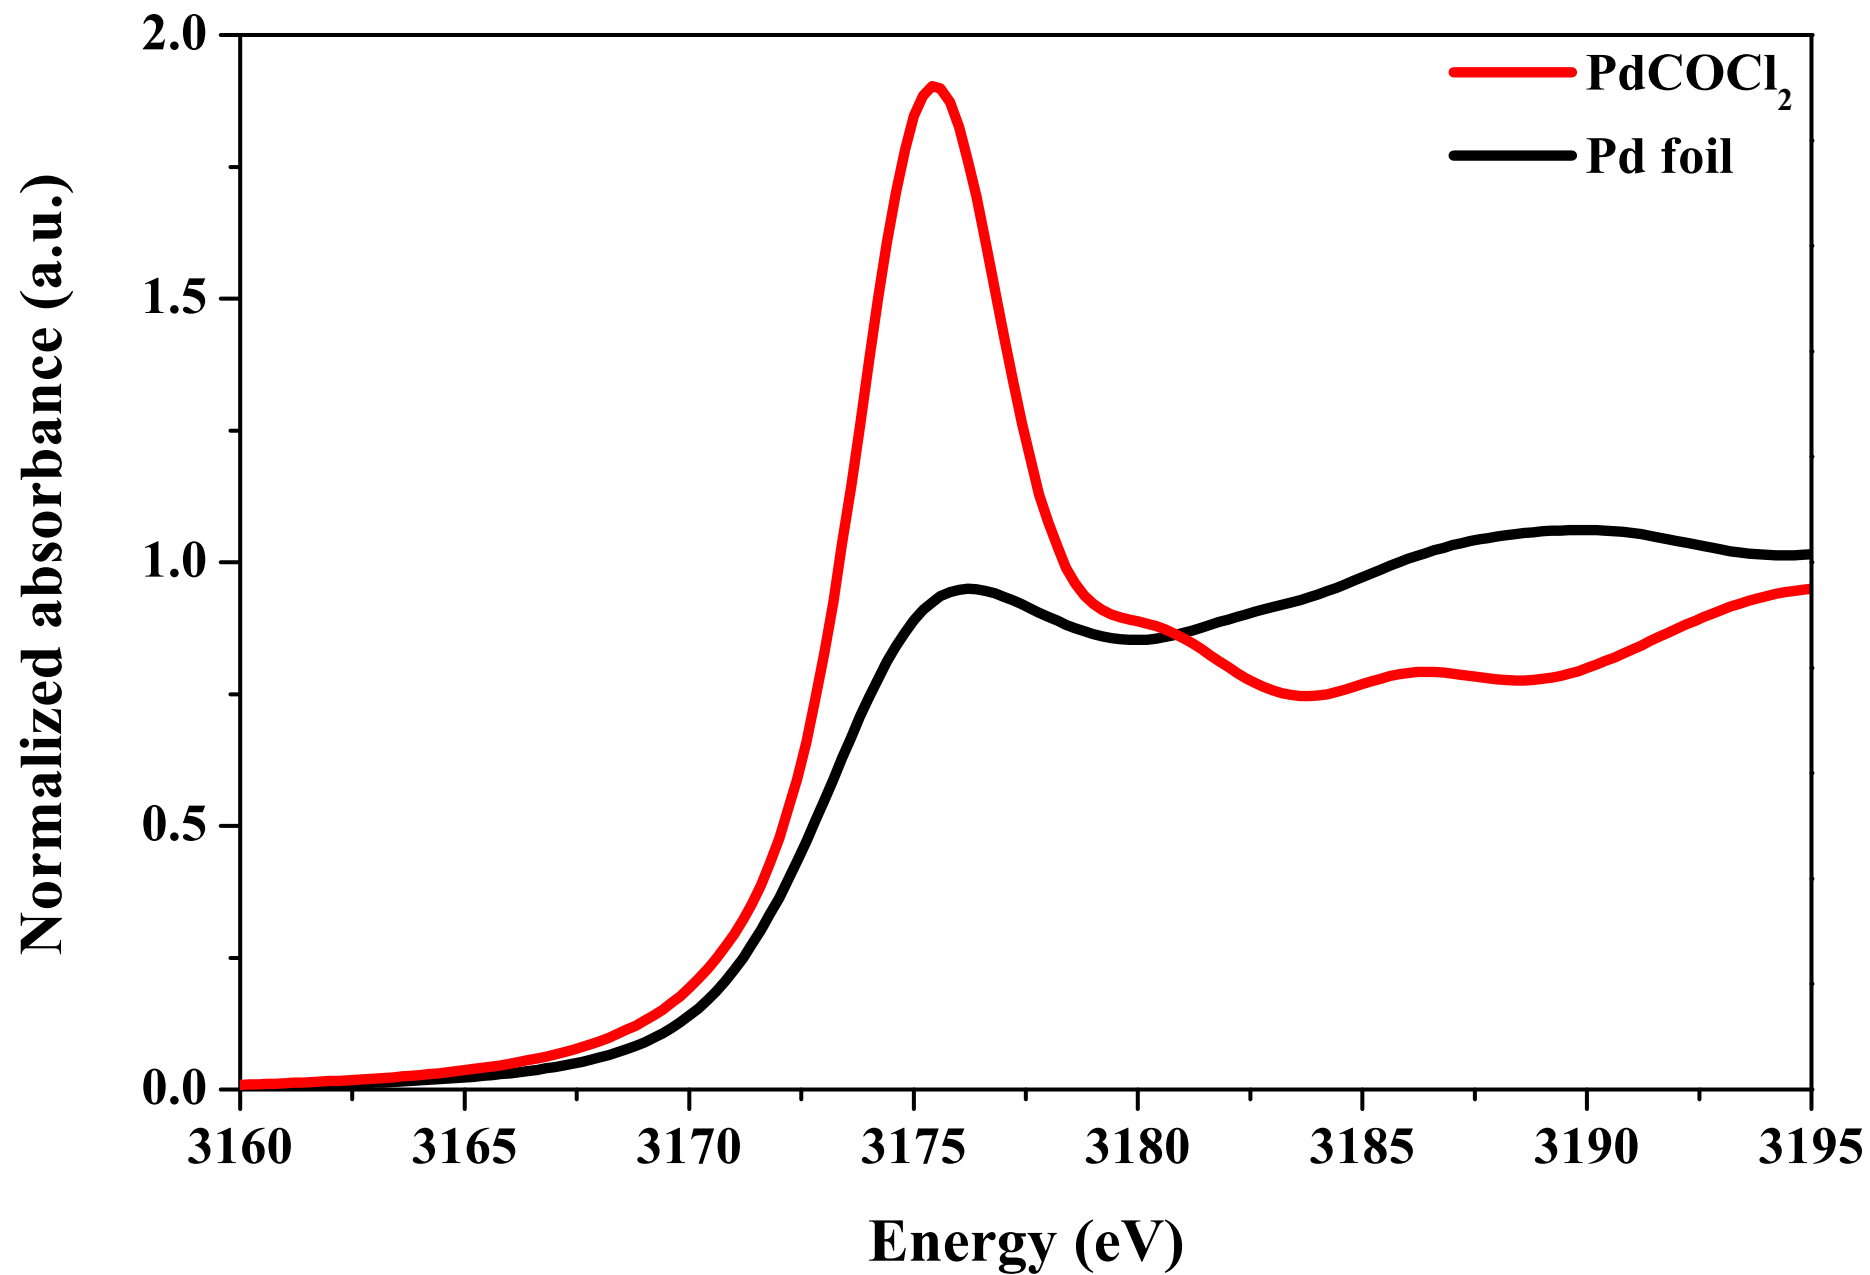

**Fig. S1** Pd L<sub>3</sub>-edge XANES spectra of Pd foil and PdCOCl<sub>2</sub> standards, recorded at room temperature.

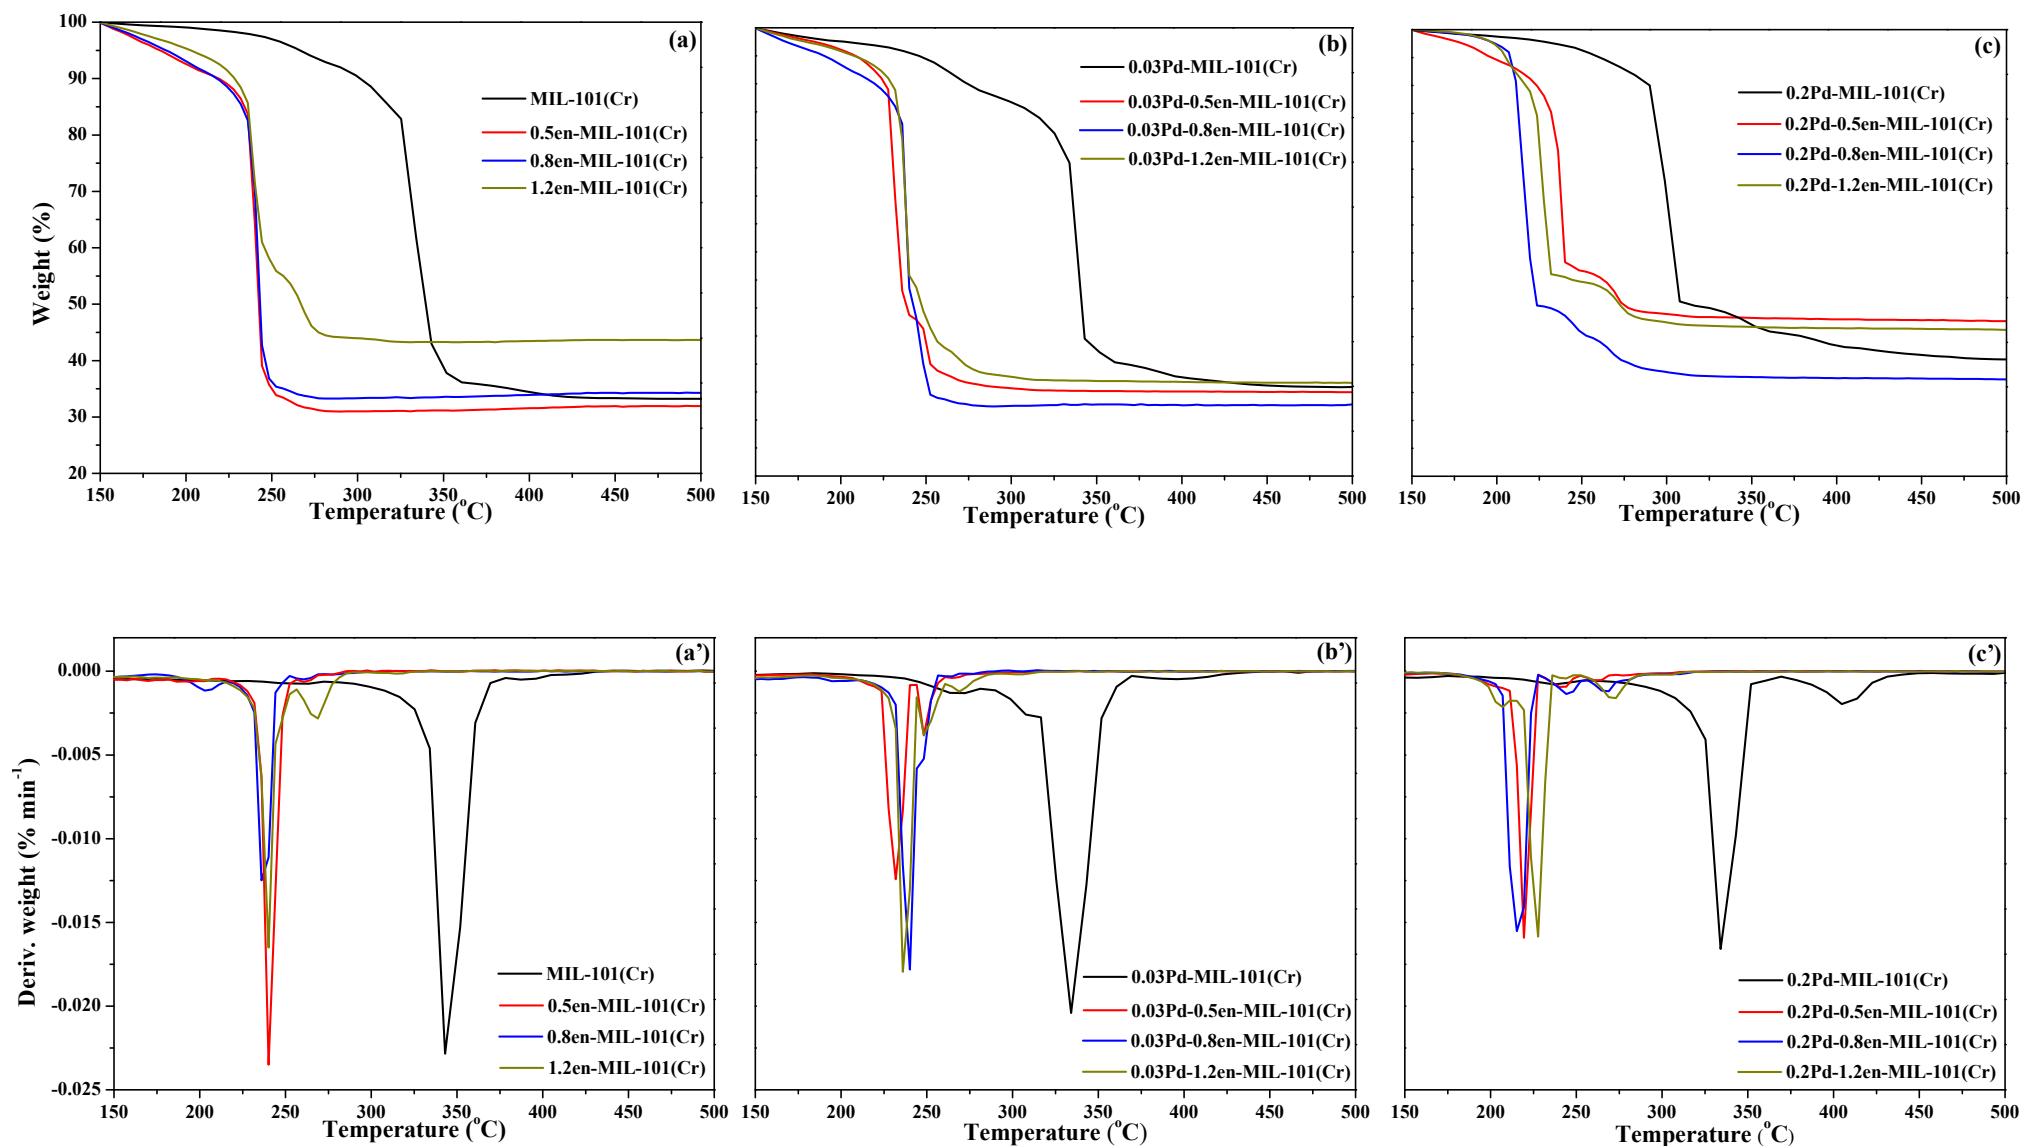

**Fig. S2** TGA and DTG thermogram of MIL-101(Cr) when (a, a') grafted with ethylenediamine and introduced (b, b') 0.03 wt%Pd and (c, c') 0.2 wt%Pd over ethylenediamine-grafted samples

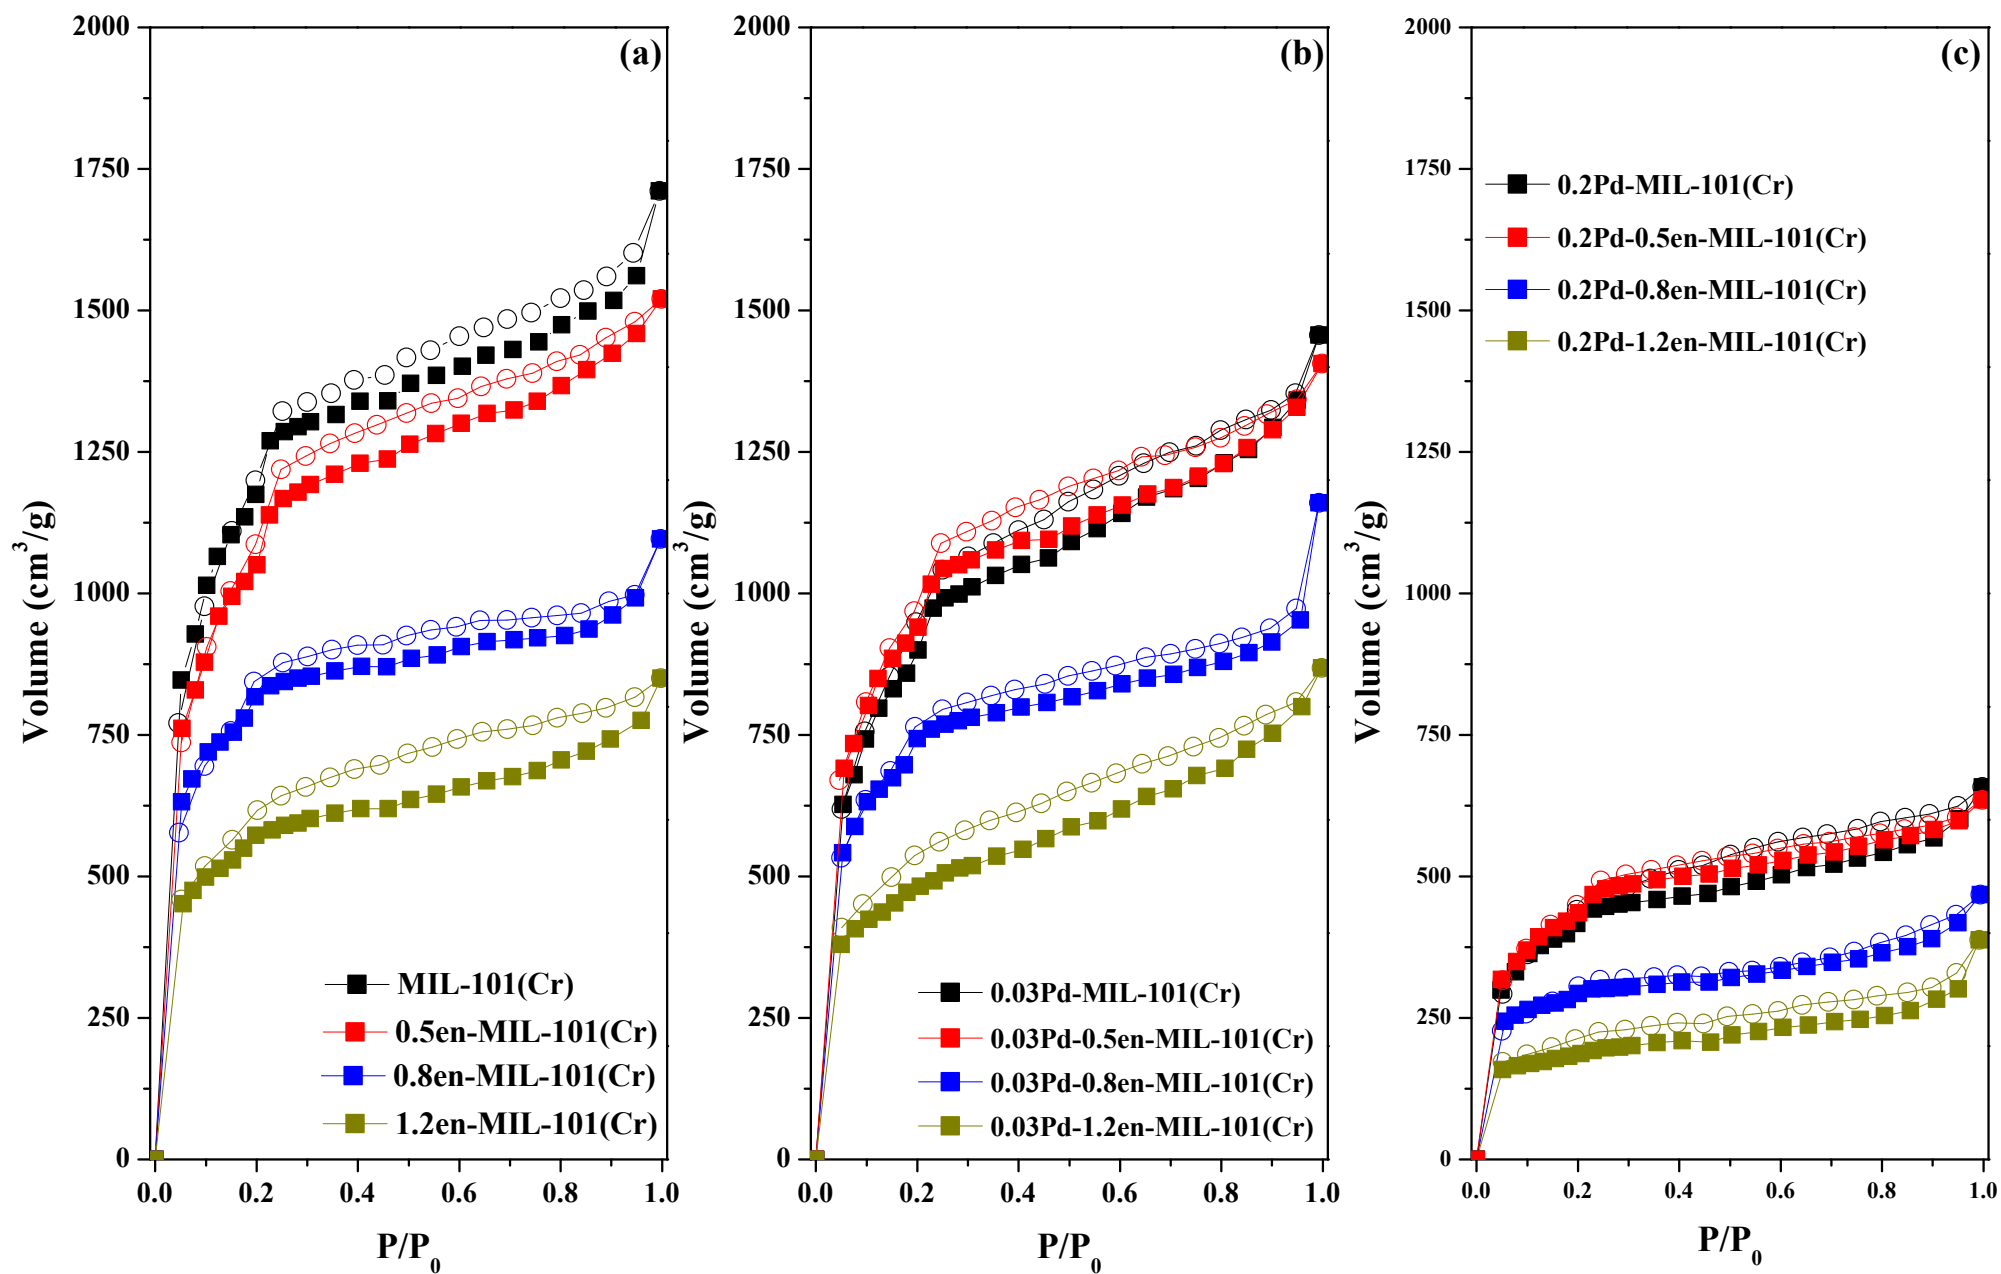

**Fig. S3**  $N_2$  adsorption isotherm of (a) ethylenediamine-grafted MIL-101(Cr) with (b) 0.03 wt%Pd and (c) 0.2 wt%Pd loadings.

## ***Determination of ethylenediamine (en) in MIL-101(Cr) samples***

The amount of ethylenediamine can be determined by the total N content from CHN analysis. However, in addition to ethylenediamine, this N content also consists of the nitrate counter anion and remained DMF, which cannot directly be measurable.

From N 1S XPS spectra (Fig. 2), the mol fraction from those N species can be calculated through integrated of each peak.

**Table S1** mol fraction and ethylenediamine content in MIL-101(Cr), en-MIL-101(Cr), Pd-en-MIL-101(Cr) and Pd-MIL-101(Cr) samples

| Entry | Samples                  | Mol fraction <sup>a</sup> (%) |                              |    | Total N content <sup>b</sup><br>(wt%) | NO <sub>3</sub> <sup>-</sup> content<br>(wt%) | en content        |                   |
|-------|--------------------------|-------------------------------|------------------------------|----|---------------------------------------|-----------------------------------------------|-------------------|-------------------|
|       |                          | DMF                           | NO <sub>3</sub> <sup>-</sup> | en |                                       |                                               | (wt%)             | (mmol/g)          |
| 1     | MIL-101(Cr)              | 47                            | 53                           | -  | 1.9                                   | 1.00                                          | -                 | -                 |
| 2     | 0.5en-MIL-101(Cr)        | -                             | 49                           | 51 | 3.2                                   | 1.57                                          | 1.63              | 0.58              |
| 3     | 0.8en-MIL-101(Cr)        | -                             | 49                           | 51 | 4.0                                   | 1.97                                          | 2.04              | 0.73              |
| 4     | 1.2en-MIL-101(Cr)        | -                             | 39                           | 61 | 5.3                                   | 2.06                                          | 3.23              | 1.15              |
| 5     | 0.03Pd-0.5en-MIL-101(Cr) | -                             | 46                           | 54 | 2.5                                   | 1.15                                          | 1.35              | 0.48              |
| 6     | 0.03Pd-0.8en-MIL-101(Cr) | -                             | -                            | -  | 3.4                                   | 1.73 <sup>c</sup>                             | 1.67 <sup>c</sup> | 0.60 <sup>c</sup> |
| 7     | 0.03Pd-1.2en-MIL-101(Cr) | -                             | 43                           | 57 | 4.6                                   | 1.96                                          | 2.62              | 0.94              |
| 8     | 0.2Pd-0.5en-MIL-101(Cr)  | -                             | -                            | -  | 2.1                                   | 1.13 <sup>c</sup>                             | 0.97 <sup>c</sup> | 0.35 <sup>c</sup> |
| 9     | 0.2Pd-0.8en-MIL-101(Cr)  | -                             | -                            | -  | 2.2                                   | 1.00 <sup>c</sup>                             | 1.20 <sup>c</sup> | 0.43 <sup>c</sup> |
| 10    | 0.2Pd-1.2en-MIL-101(Cr)  | -                             | 42                           | 58 | 3.3                                   | 1.40                                          | 1.91              | 0.68              |
| 11    | 0.03Pd-MIL-101(Cr)       | 55                            | 45                           | -  | 1.6                                   | 0.72                                          | -                 | -                 |
| 12    | 0.2Pd-MIL-101(Cr)        | -                             | -                            | -  | 1.3                                   | -                                             | -                 | -                 |

<sup>a</sup>Calculated from integrated peak of N 1S XPS spectra, <sup>b</sup>CHN analysis and <sup>c</sup>Estimated content

## *Calculation of ethylenediamine content*

From XPS result, we can calculate ethylenediamine content as follow;

For example, 1.2en-MIL-101(Cr)

*From XPS analysis*

$$\text{N \%mol of nitrate} = 39 \quad \%$$

$$\text{N \%mol of ethylenediamine} = 61 \quad \%$$

*From CHN analysis*

$$\begin{aligned} \text{Total N content} &= 5.3 && \text{wt\%} \\ &= 5.3 && \text{g/100 g}_{\text{sample}} \end{aligned}$$

$$\begin{aligned} \text{N content of nitrate} &= (5.3 \times 39) / 100 && \text{g/100 g}_{\text{sample}} \\ &= 2.1 && \text{g/100 g}_{\text{sample}} \end{aligned}$$

$$\begin{aligned} \text{N content of ethylenediamine} &= (5.3 \times 61) / 100 && \text{g/100 g}_{\text{sample}} \\ &= 3.23 && \text{g/100 g}_{\text{sample}} \end{aligned}$$

$$\begin{aligned} \text{mmol of ethylenediamine} &= (3.2 \times 1000) / (14 \times 2) && \text{mmol/100g}_{\text{sample}} \\ &= 115 && \text{mmol/100g}_{\text{sample}} \\ &= 1.15 && \text{mmol/g}_{\text{sample}} \end{aligned}$$

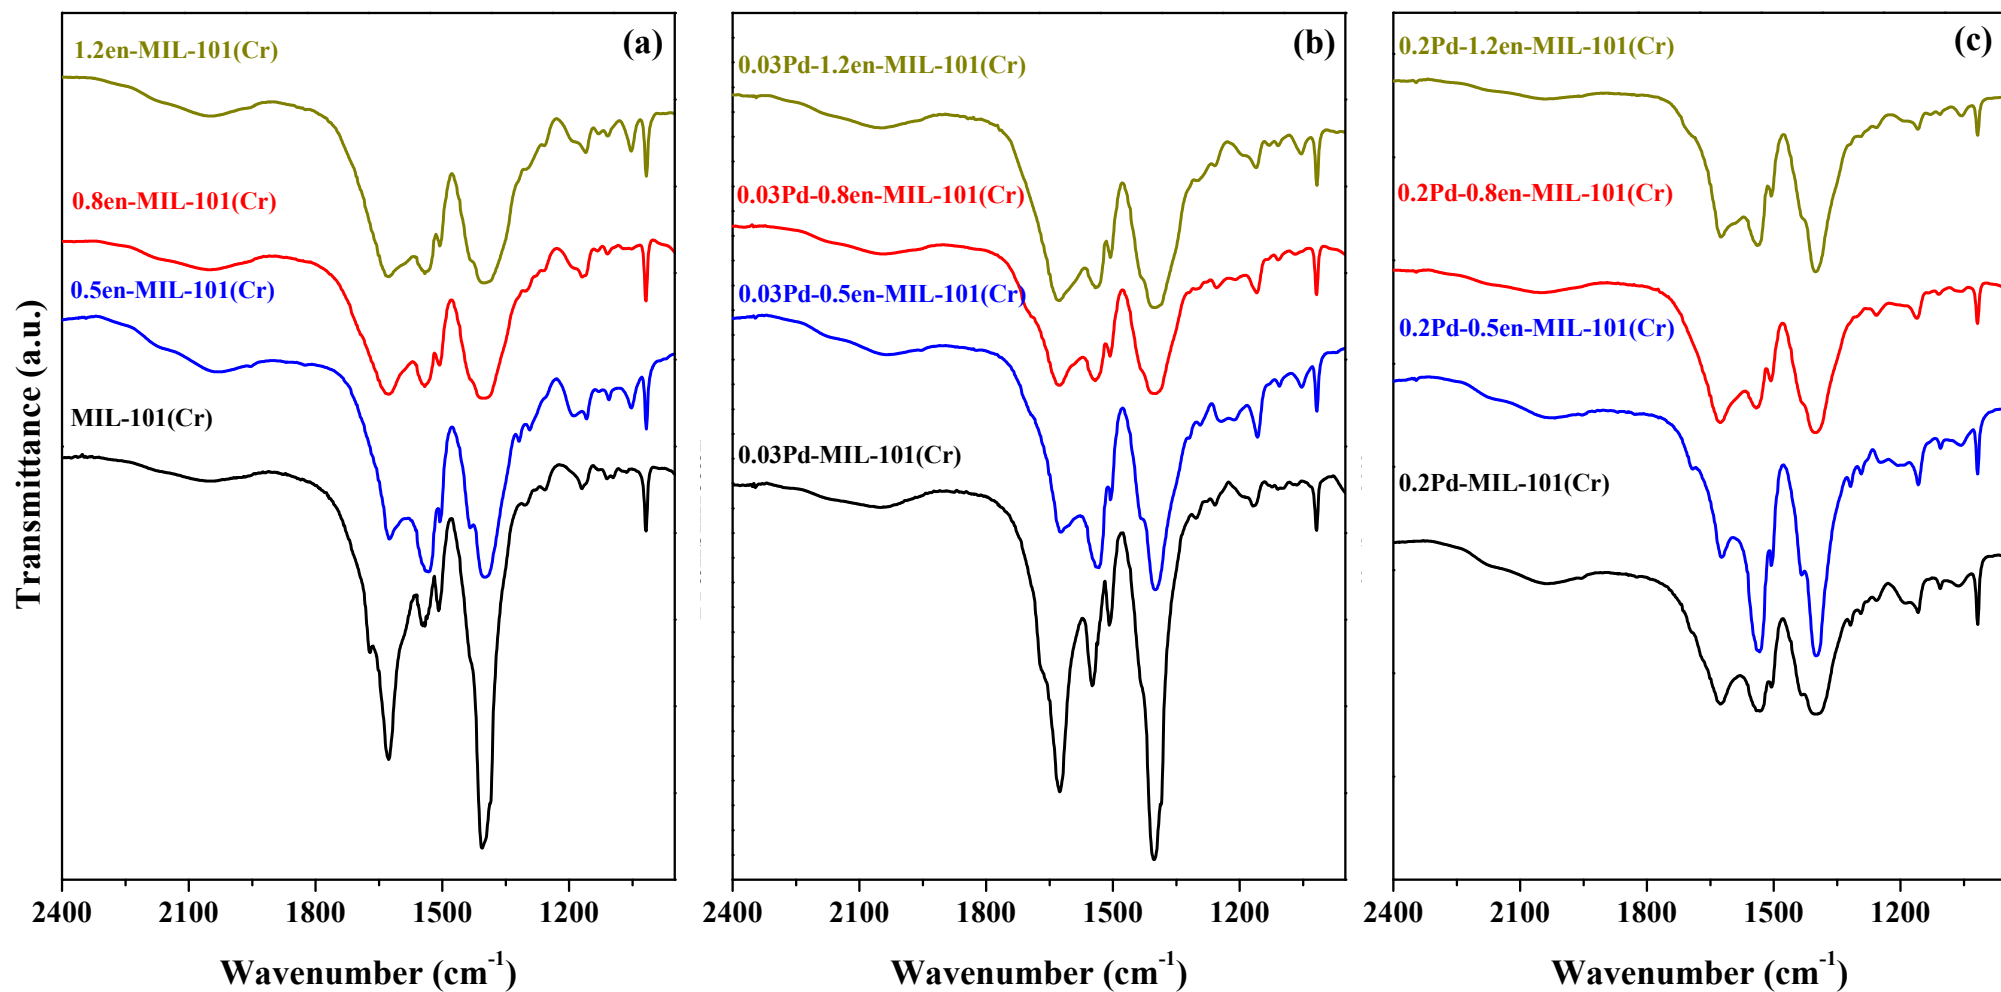

**Fig. S4** FTIR spectra of (a) ethylenediamine-grafted MIL-101(Cr) with (b) 0.03 wt%Pd and (c) 0.2 wt%Pd loadings.



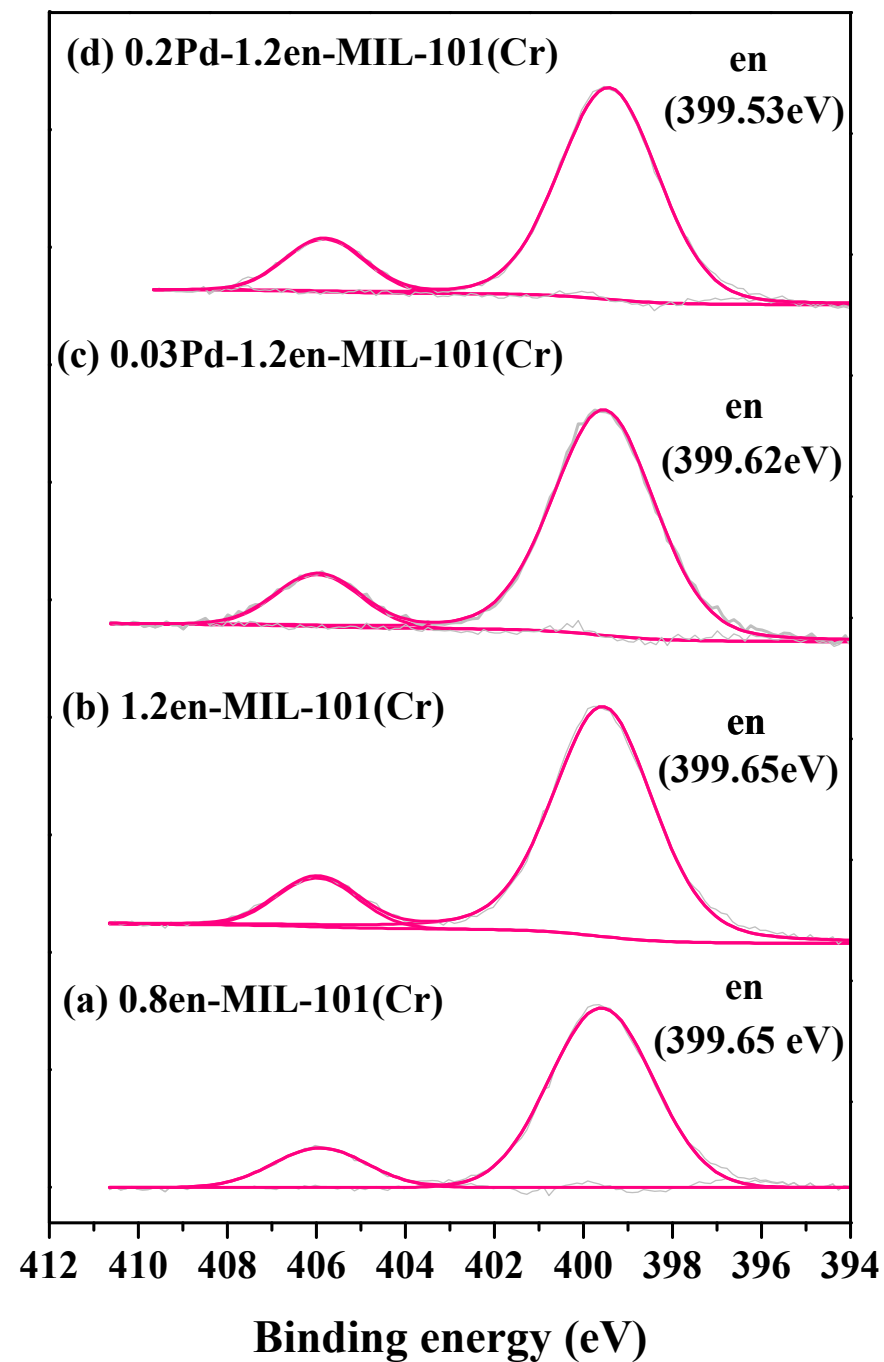

**Fig. S5** High-resolution N 1s XPS spectra of (a) 0.8en-MIL-101(Cr), (b) 1.2en-MIL-101(Cr), (c) 0.03Pd-1.2en-MIL-101(Cr) and (d) 0.2Pd-1.2en-MIL-101(Cr) samples.

**Table S2** Absorption edge energy of all samples under *in situ* reduction from 30 °C to 150 °C

|                                     | Temp (°C)   | Absorption edge energy (eV) |                    |                         |                         |                   |                        |
|-------------------------------------|-------------|-----------------------------|--------------------|-------------------------|-------------------------|-------------------|------------------------|
|                                     |             | 0.03Pd-1.2en-MIL-101(Cr)    | 0.03Pd-MIL-101(Cr) | 0.03Pd-SiO <sub>2</sub> | 0.2Pd-0.8en-MIL-101(Cr) | 0.2Pd-MIL-101(Cr) | 0.2Pd-SiO <sub>2</sub> |
| Activation                          | 150         | 3174.2                      | 3174.1             | 3173.3                  | 3174.2                  | 3173.6            | 3173.7                 |
|                                     | 30          | 3174.2                      | 3173.1             | 3173.4                  | 3174.2                  | 3173.5            | 3173.6                 |
| Reduction under H <sub>2</sub>      | 70          | 3174.2                      | 3173.2             | 3173.3                  | 3174.2                  | 3173.3            | 3173.4                 |
|                                     | 110         | 3174.2                      | 3173.1             | 3173.5                  | 3174.2                  | 3173.4            | 3173.5                 |
|                                     | 150         | 3174.2                      | 3173.0             | 3173.1                  | 3174.2                  | 3173.4            | 3173.5                 |
| Holding in H <sub>2</sub> at 150 °C | 150 (20min) | 3174.2                      | 3173.2             | 3173.4                  | 3174.2                  | 3173.2            | 3173.4                 |
|                                     | 150 (40min) | 3174.2                      | 3173.2             | 3173.4                  | 3174.2                  | 3173.3            | 3173.5                 |
|                                     | 150 (60min) | 3174.2                      | 3173.2             | 3173.3                  | 3174.2                  | 3173.3            | 3173.5                 |

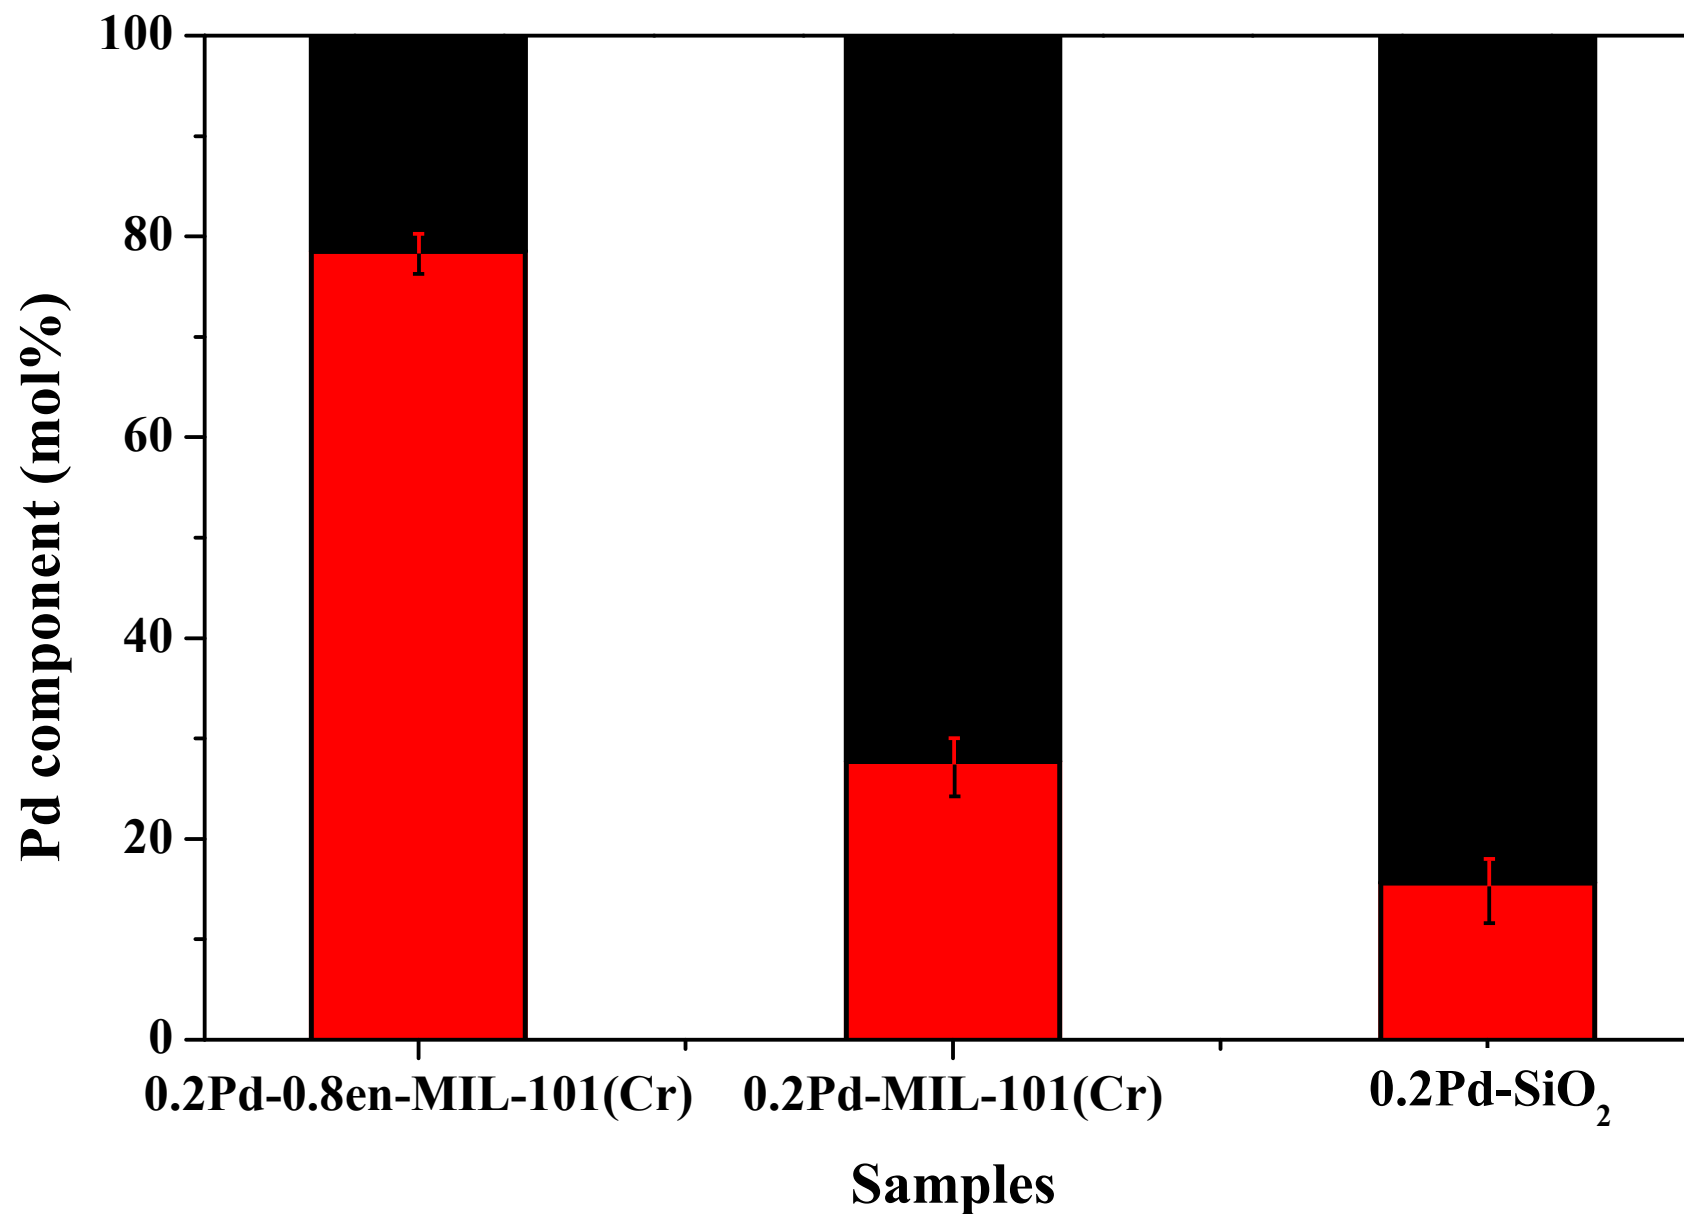

**Fig. S6** Pd component from Pd L<sub>3</sub>-edge XANES linear combination fitting of 0.2Pd-0.8en-MIL-101(Cr), 0.2Pd-MIL-101(Cr) and 0.2Pd-SiO<sub>2</sub> upon in situ reduction at 150 °C under 10%H<sub>2</sub>/N<sub>2</sub>.

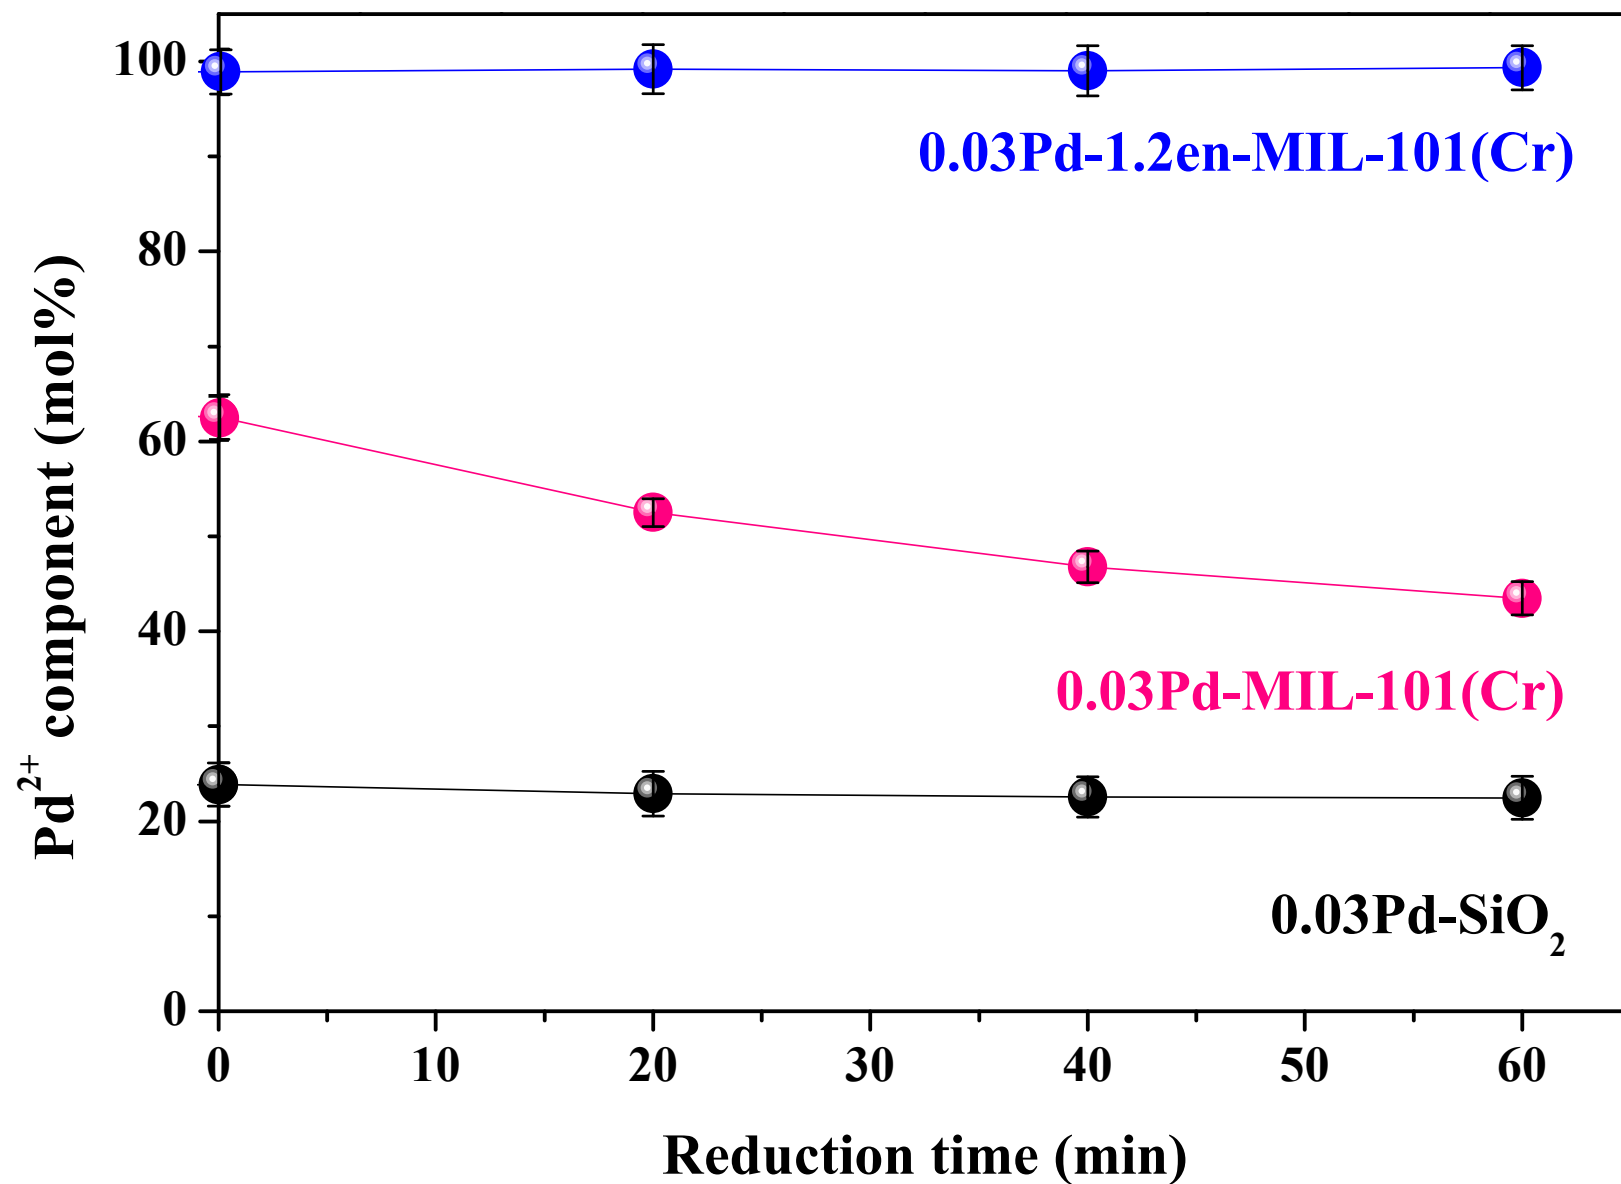

**Fig. S7** Pd<sup>2+</sup> component from Pd L<sub>3</sub>-edge XANES linear combination fitting of 0.03Pd-1.2en-MIL-101(Cr), 0.03Pd-MIL-101(Cr) and 0.03Pd-SiO<sub>2</sub> upon in situ reduction at 150°C during 0 – 60 min under 10%H<sub>2</sub> in N<sub>2</sub>.

**Table S3** R-factor of 0.03 wt%Pd loaded over 1.2en-MIL-101(Cr), MIL-101(Cr) and SiO<sub>2</sub> samples and 0.2 wt%Pd loaded over 0.8en-MIL-101(Cr), MIL-101(Cr) and SiO<sub>2</sub> samples after linear combination fitting.

|                                                         | Temperature<br>(°C) | R factor *                   |                        |                         |                             |                       |                        |
|---------------------------------------------------------|---------------------|------------------------------|------------------------|-------------------------|-----------------------------|-----------------------|------------------------|
|                                                         |                     | 0.03Pd-1.2en-<br>MIL-101(Cr) | 0.03Pd-MIL-<br>101(Cr) | 0.03Pd-SiO <sub>2</sub> | 0.2Pd-0.8en-<br>MIL-101(Cr) | 0.2Pd-MIL-<br>101(Cr) | 0.2Pd-SiO <sub>2</sub> |
| Activation                                              | 150                 | 0.045                        | 0.007                  | 0.050                   | 0.046                       | 0.035                 | 0.037                  |
|                                                         | 30                  | 0.045                        | 0.009                  | 0.043                   | 0.037                       | 0.048                 | 0.053                  |
| Reduction<br>under<br>10%H <sub>2</sub> /N <sub>2</sub> | 70                  | 0.045                        | 0.027                  | 0.044                   | 0.026                       | 0.045                 | 0.054                  |
|                                                         | 110                 | 0.031                        | 0.040                  | 0.044                   | 0.028                       | 0.046                 | 0.051                  |
|                                                         | 150                 | 0.038                        | 0.014                  | 0.045                   | 0.030                       | 0.044                 | 0.057                  |
|                                                         | 150 (20 min)        | 0.043                        | 0.021                  | 0.036                   | 0.034                       | 0.051                 | 0.051                  |
| Hold at 150°C                                           | 150 (40 min)        | 0.045                        | 0.023                  | 0.041                   | 0.027                       | 0.059                 | 0.057                  |
|                                                         | 150 (60 min)        | 0.034                        | 0.007                  | 0.050                   | 0.046                       | 0.034                 | 0.037                  |

$$* R = \frac{\sum(data - fit)^2}{\sum(data)^2}$$

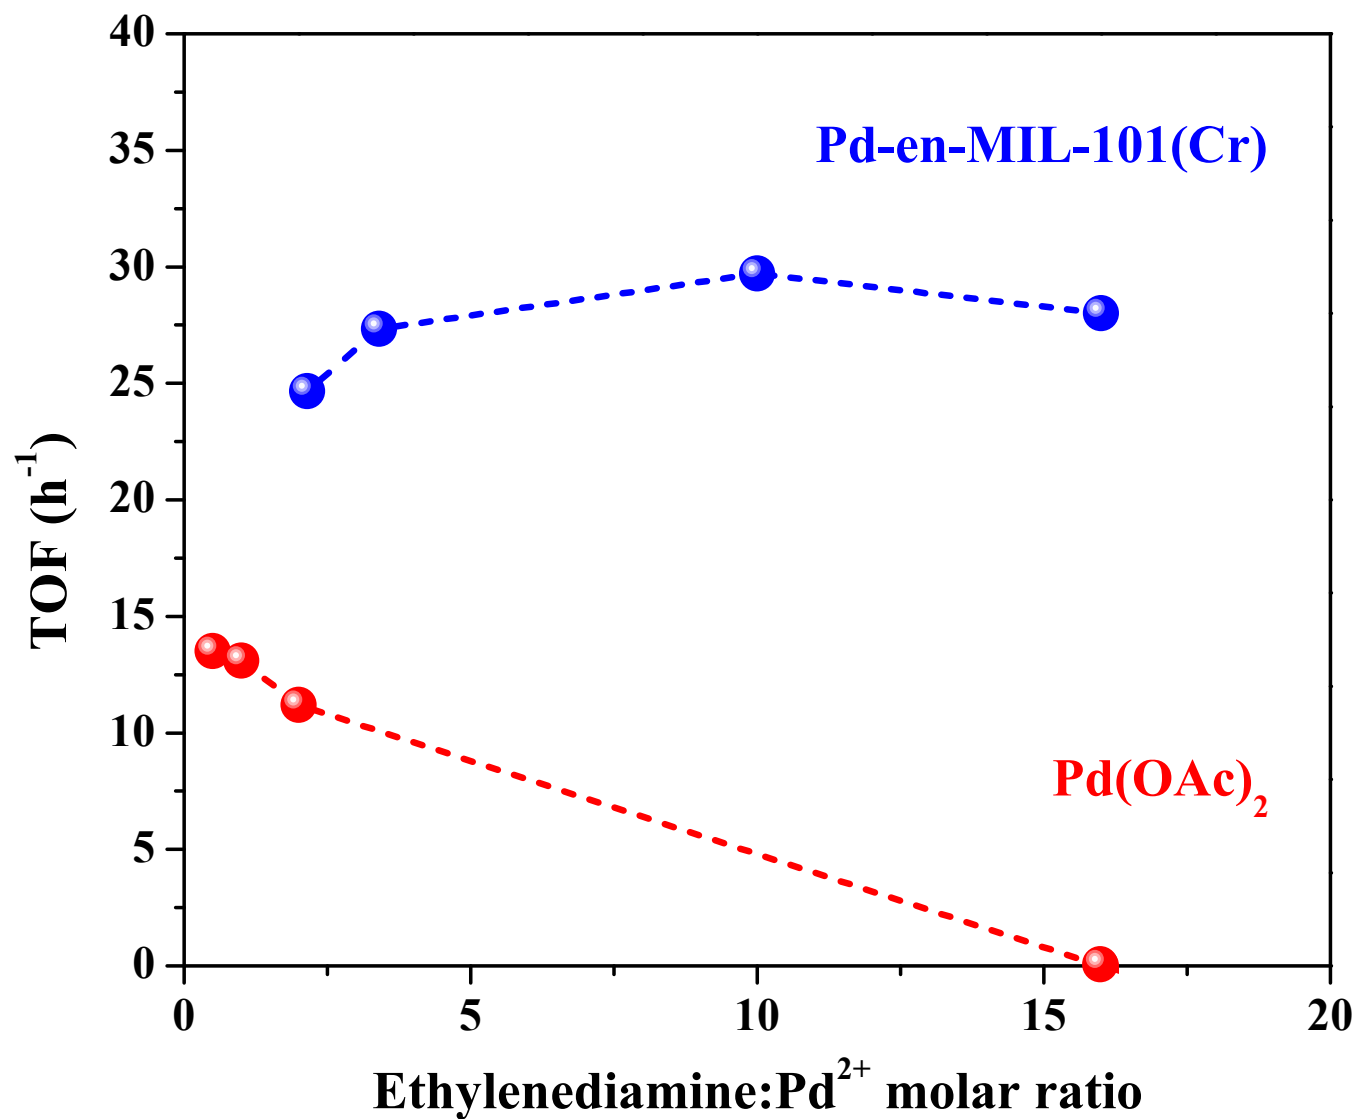

**Fig. S8** Effect of ethylenediamine on Pd<sup>2+</sup> activity of Pd-en-MIL-101(Cr) and Pd(OAc)<sub>2</sub>.
